# Supplementary material for: Synthesis of N-doped chiral macrocycles by regioselective palladium-catalyzed arylation
Source: publisher site journal article supplement (doi:10.3762/bjoc.21.149), 2025-09-15

## checkCIF/PLATON report

Structure factors have been supplied for datablock(s) cu\_hku\_dicz\_p2\_0m

THIS REPORT IS FOR GUIDANCE ONLY. IF USED AS PART OF A REVIEW PROCEDURE FOR PUBLICATION, IT SHOULD NOT REPLACE THE EXPERTISE OF AN EXPERIENCED CRYSTALLOGRAPHIC REFEREE.

No syntax errors found.      CIF dictionary      Interpreting this report

### Datablock: cu\_hku\_dicz\_p2\_0m

---

Bond precision:      C-C = 0.0074 Å

Wavelength=1.54178

Cell:                      a=14.6091(3)                      b=15.3776(4)                      c=22.3624(5)  
                              alpha=92.706(2)                      beta=102.868(2)                      gamma=107.854(2)  
Temperature:              223 K

|                        | Calculated             | Reported    |
|------------------------|------------------------|-------------|
| Volume                 | 4625.5(2)              | 4625.50(19) |
| Space group            | P -1                   | P -1        |
| Hall group             | -P 1                   | -P 1        |
| Moiety formula         | C92 H84 N4 [+ solvent] | C92 H84 N4  |
| Sum formula            | C92 H84 N4 [+ solvent] | C92 H84 N4  |
| Mr                     | 1245.64                | 1245.63     |
| Dx, g cm <sup>-3</sup> | 0.894                  | 0.894       |
| Z                      | 2                      | 2           |
| Mu (mm <sup>-1</sup> ) | 0.390                  | 0.390       |
| F000                   | 1328.0                 | 1328.0      |
| F000'                  | 1331.38                |             |
| h,k,lmax               | 17,18,26               | 17,18,26    |
| Nref                   | 16352                  | 16257       |
| Tmin,Tmax              | 0.951,0.958            | 0.533,0.753 |
| Tmin'                  | 0.951                  |             |

Correction method= # Reported T Limits: Tmin=0.533 Tmax=0.753  
AbsCorr = MULTI-SCAN

Data completeness= 0.994

Theta(max)= 66.593

R(reflections)= 0.1085( 10661)

wR2(reflections)=  
0.2761( 16257)

S = 1.001

Npar= 914

---

The following ALERTS were generated. Each ALERT has the format

**test-name\_ALERT\_alert-type\_alert-level.**

Click on the hyperlinks for more details of the test.

---

### Alert level C

DIFMX02\_ALERT\_1\_C The maximum difference density is > 0.1\*ZMAX\*0.75

The relevant atom site should be identified.

|                   |                                                             |         |        |
|-------------------|-------------------------------------------------------------|---------|--------|
| PLAT082_ALERT_2_C | High R1 Value .....                                         | 0.11    | Report |
| PLAT084_ALERT_3_C | High wR2 Value (i.e. > 0.25) .....                          | 0.28    | Report |
| PLAT097_ALERT_2_C | Large Reported Max. (Positive) Residual Density             | 0.70    | eA-3   |
| PLAT220_ALERT_2_C | NonSolvent Resd 1 C Ueq(max)/Ueq(min) Range                 | 3.3     | Ratio  |
| PLAT222_ALERT_3_C | NonSolvent Resd 1 H Uiso(max)/Uiso(min) Range               | 4.1     | Ratio  |
| PLAT234_ALERT_4_C | Large Hirshfeld Difference C89 --C91 .                      | 0.17    | Ang.   |
| PLAT234_ALERT_4_C | Large Hirshfeld Difference C89 --C90A .                     | 0.19    | Ang.   |
| PLAT242_ALERT_2_C | Low 'MainMol' Ueq as Compared to Neighbors of               | C17     | Check  |
| PLAT242_ALERT_2_C | Low 'MainMol' Ueq as Compared to Neighbors of               | C39     | Check  |
| PLAT242_ALERT_2_C | Low 'MainMol' Ueq as Compared to Neighbors of               | C43     | Check  |
| PLAT242_ALERT_2_C | Low 'MainMol' Ueq as Compared to Neighbors of               | C85     | Check  |
| PLAT242_ALERT_2_C | Low 'MainMol' Ueq as Compared to Neighbors of               | C89     | Check  |
| PLAT340_ALERT_3_C | Low Bond Precision on C-C Bonds .....                       | 0.00743 | Ang.   |
| PLAT906_ALERT_3_C | Large K Value in the Analysis of Variance .....             | 5.465   | Check  |
| PLAT906_ALERT_3_C | Large K Value in the Analysis of Variance .....             | 2.481   | Check  |
| PLAT911_ALERT_3_C | Missing FCF Refl Between Thmin & STh/L= 0.595               | 95      | Report |
|                   | -3 1 0, -2 1 0, -1 1 0, 0 1 0, -3 2 0, 0 3 0,               |         |        |
|                   | -1 4 0, -12 11 0, 8-18 1, 5 -9 1, 2 -4 1, 1 -3 1,           |         |        |
|                   | 5 -3 1, 2 -2 1, 3 -2 1, 4 -2 1, 2 -1 1, -2 2 1,             |         |        |
|                   | 2 2 1, -4 3 1, -2 3 1, -2 4 1, 1 5 1, -6 8 1,               |         |        |
|                   | 2 8 1, 8-18 2, -2 -7 2, -3 -6 2, 0 -3 2, 1 -3 2,            |         |        |
|                   | 4 -3 2, -5 -2 2, 1 -2 2, 0 1 2, 2 3 2, -3 14 2,             |         |        |
|                   | 4 -9 3, -1 0 3, -1 1 3, 2 1 3, 3 1 3, 3 2 3,                |         |        |
|                   | -2 3 3, 1 5 3, 2 5 3, 1 6 3, 3 -7 4, 1 -2 4,                |         |        |
|                   | 1 -1 4, -2 2 4, 10 9 4, 9 10 4, 6 12 4, 2 -7 5,             |         |        |
|                   | 1 -3 5, 1 0 5, -1 1 5, 3 1 5, 3 2 5, -9 4 5,                |         |        |
|                   | -7 7 5, 10 9 5, 9 10 5, 3 -7 6, 6 -3 6, 2 2 6,              |         |        |
|                   | -4 3 6, -7 7 6, 3 -8 7, 7 11 7, 4 -7 8, 15 -6 8,            |         |        |
|                   | -5 1 8, -8 2 8, 8 10 8, 7 11 8, 6 12 8, -8 5 9,             |         |        |
|                   | 6 11 10, 2 -5 11, -1 0 11, 10 -7 12, 6 10 12, 5 11 12,      |         |        |
|                   | -11 13 13, -16 4 15, 4 10 15, -15 5 17, -15 6 17, -15 3 18, |         |        |
|                   | -15 4 18, -15 5 18, -13 2 19, -11 -4 21, 2 -3 25,           |         |        |
| PLAT918_ALERT_3_C | Reflection(s) with I(obs) much Smaller I(calc) .            | 1       | Check  |

### Alert level G

|                   |                                                  |        |        |
|-------------------|--------------------------------------------------|--------|--------|
| PLAT002_ALERT_2_G | Number of Distance or Angle Restraints on AtSite | 7      | Note   |
| PLAT003_ALERT_2_G | Number of Uiso or U(i,j) Restrained non-H Atoms  | 6      | Report |
| PLAT083_ALERT_2_G | SHELXL Second Parameter in WGHT Unusually Large  | 20.00  | Why ?  |
| PLAT154_ALERT_1_G | The s.u.'s on the Cell Angles are Equal ..(Note) | 0.002  | Degree |
| PLAT172_ALERT_4_G | The CIF-Embedded .res File Contains DFIX Records | 1      | Report |
| PLAT176_ALERT_4_G | The CIF-Embedded .res File Contains SADI Records | 3      | Report |
| PLAT178_ALERT_4_G | The CIF-Embedded .res File Contains SIMU Records | 1      | Report |
| PLAT187_ALERT_4_G | The CIF-Embedded .res File Contains RIGU Records | 2      | Report |
| PLAT188_ALERT_3_G | A Non-default SIMU Restraint Value has been used | 0.0100 | Report |
| PLAT190_ALERT_3_G | A Non-default RIGU Restraint Value for First Par | 0.0100 | Report |
| PLAT190_ALERT_3_G | A Non-default RIGU Restraint Value for SecondPar | 0.0200 | Report |
| PLAT190_ALERT_3_G | A Non-default RIGU Restraint Value for First Par | 0.0100 | Report |



It is advisable to attempt to resolve as many as possible of the alerts in all categories. Often the minor alerts point to easily fixed oversights, errors and omissions in your CIF or refinement strategy, so attention to these fine details can be worthwhile. In order to resolve some of the more serious problems it may be necessary to carry out additional measurements or structure refinements. However, the purpose of your study may justify the reported deviations and the more serious of these should normally be commented upon in the discussion or experimental section of a paper or in the "special\_details" fields of the CIF. checkCIF was carefully designed to identify outliers and unusual parameters, but every test has its limitations and alerts that are not important in a particular case may appear. Conversely, the absence of alerts does not guarantee there are no aspects of the results needing attention. It is up to the individual to critically assess their own results and, if necessary, seek expert advice.

### **Publication of your CIF in IUCr journals**

A basic structural check has been run on your CIF. These basic checks will be run on all CIFs submitted for publication in IUCr journals (*Acta Crystallographica*, *Journal of Applied Crystallography*, *Journal of Synchrotron Radiation*); however, if you intend to submit to *Acta Crystallographica Section C* or *E* or *IUCrData*, you should make sure that full publication checks are run on the final version of your CIF prior to submission.

### **Publication of your CIF in other journals**

Please refer to the *Notes for Authors* of the relevant journal for any special instructions relating to CIF submission.

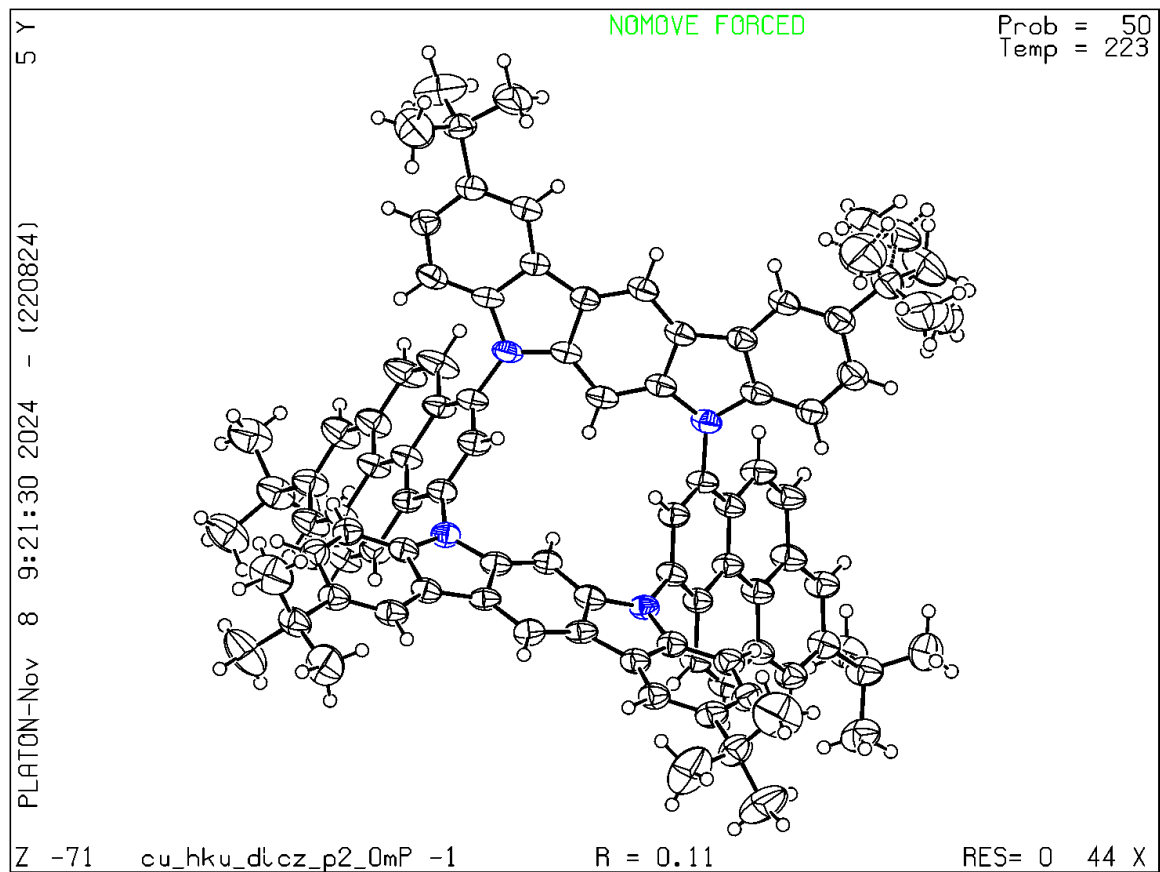

Supplement: Additional file 2 [file MC2_cifreport.pdf › MC2_cifreport.pdf]
