# Supplementary material for: Synthesis of N-doped chiral macrocycles by regioselective palladium-catalyzed arylation
Source: publisher site journal article supplement (doi:10.3762/bjoc.21.149), 2025-09-15
Supplement: Additional file 1 [file 1860-5397-21-149-S1.pdf]

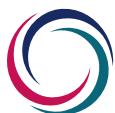

## Supporting Information

for

### Synthesis of N-doped chiral macrocycles by regioselective palladium-catalyzed arylation

Shuhai Qiu and Junzhi Liu

*Beilstein J. Org. Chem.* **2025**, 21, 1917–1923. doi:10.3762/bjoc.21.149

### Experimental procedures, synthetic details, and X-ray crystallographic data

## Table of contents

|                                                       |     |
|-------------------------------------------------------|-----|
| 1. Materials and measurements .....                   | S2  |
| 2. Synthetic details .....                            | S3  |
| 3. Chiral HPLC chromatograms .....                    | S7  |
| 4. X-ray crystal structures.....                      | S9  |
| 5. Theoretical calculations.....                      | S15 |
| 6. $^1\text{H}$ and $^{13}\text{C}$ NMR spectra ..... | S16 |
| 7. Mass spectra .....                                 | S22 |
| 8. References .....                                   | S25 |

## 1. Materials and measurements

Solvents were purified and dried by standard methods prior to use. All commercially available reagents were used without further purification unless otherwise noted. Column chromatography was generally performed on silica gel (200–300 mesh) and reactions were monitored by thin-layer chromatography (TLC) using silica gel GF254 plates with UV light to visualize the course of reaction. The  $^1\text{H}$  and  $^{13}\text{C}$  2D NMR data were recorded on a 500 MHz or 600 MHz spectrometer using  $\text{DMSO-}d_6$  or  $\text{CD}_2\text{Cl}_2$  as solvent. All chemical shifts are quoted in ppm, relative to tetramethylsilane, using residual solvent peak as a reference standard. The following abbreviations were used to explain the multiplicities: s = singlet, d = doublet, m = multiplet. Mass spectra were obtained on a Bruker Q-ToF Maxis II mass spectrometer and MALDI-TOF MS system, Bruker ultrafleXtreme. UV–vis spectroscopy was performed on an Agilent Cary 60. The photoluminescence spectra were conducted on a Cary Eclipse Fluorescence Spectrofluorometer, Agilent Cary G9800AA. The quantum yields were measured on a Hamamatsu UV-NIR absolute PL quantum yield Spectrometer C13534. Single crystal data collections were performed on a Bruker D8 Venture with a  $\text{CuK}\alpha$  ( $\lambda = 1.5406 \text{ \AA}$ ) or  $\text{GaK}\alpha$  ( $\lambda = 1.34139$ ) X-ray source. All calculations were performed using the SHELXL and the crystal structure crystallographic software package.

## 2. Synthetic details

### Synthesis of 1a

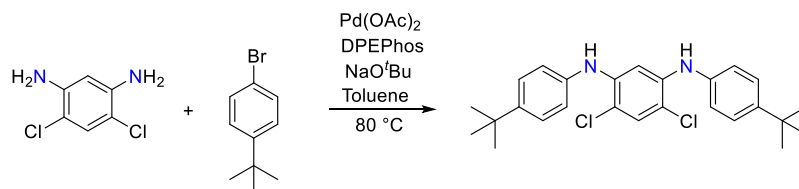

A Schlenk flask was charged with 4,6-dichlorobenzene-1,3-diamine (1.0 g, 5.7 mmol, 1 equiv), 1-bromo-4-(*tert*-butyl)benzene (2.6 g, 12.4 mmol, 2.2 equiv), Pd(OAc)<sub>2</sub> (127 mg, 10 mol %), bis[(2-diphenylphosphino)phenyl] ether (DPEphos, 456 mg, 15 mol %), NaOt-Bu (1.63 g, 17.1 mmol, 3 equiv) and dry toluene (50 mL) under argon. The mixture was heated to 80 °C with vigorous stirring for 15 h. The mixture was cooled and filtered, and the filtrate was evaporated to dryness. The residue was purified by the column chromatography on silica gel (petroleum ether/CH<sub>2</sub>Cl<sub>2</sub> 2:1) to afford **1a** as a white solid (2.5 g, 99% yield). <sup>1</sup>H NMR (600 MHz, DMSO-*d*<sub>6</sub>): δ 7.49 (s, 2H), 7.39 (s, 1H), 7.29 - 7.23 (m, 4H), 7.04 (d, *J*=8.6 Hz, 4H), 6.92 (s, 1H), 1.22 (s, 18H). <sup>13</sup>C NMR (150 MHz, DMSO-*d*<sub>6</sub>): δ 144.0, 140.5, 139.2, 129.7, 125.6, 119.8, 111.3, 103.4, 33.8, 31.2. MS (MALDI-TOF, 100%): *m/z* calcd (%) for C<sub>26</sub>H<sub>30</sub>Cl<sub>2</sub>N<sub>2</sub>: 440.1781, found: 440.1910.

### Synthesis of 1b

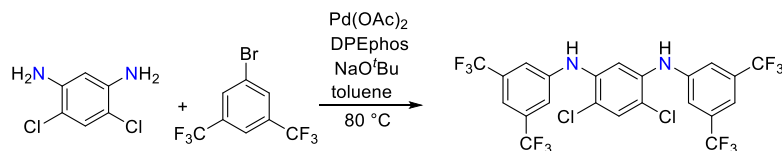

A Schlenk flask was charged with 4,6-dichlorobenzene-1,3-diamine (1.0 g, 5.7 mmol, 1 equiv), 1-bromo-4-(*tert*-butyl)benzene (3.6 g, 12.4 mmol, 2.2 equiv), Pd(OAc)<sub>2</sub> (127 mg, 10 mol %), DPEphos (456 mg, 15 mol %), NaOt-Bu (1.63 g, 17.1 mmol, 3 equiv) and dry toluene (50 mL) under argon. The mixture was heated to 80 °C with vigorous stirring for 15 h. The mixture was cooled and filtered, and the filtrate was evaporated to dryness. The residue was purified by column chromatography on silica gel (petroleum ether/CH<sub>2</sub>Cl<sub>2</sub> 2:1) to afford **1b** as a white solid (0.6 g, 19% yield). <sup>1</sup>H NMR (600 MHz, DMSO-*d*<sub>6</sub>): δ 8.69 (s, 2H), 7.80 (s, 1H), 7.40 (d, *J*=13.3 Hz, 6H), 7.32 (s, 1H). <sup>19</sup>F NMR (565 MHz, DMSO-*d*<sub>6</sub>): δ -61.9. <sup>13</sup>C NMR (150 MHz, DMSO-*d*<sub>6</sub>): δ 145.7, 137.8, 131.5, 131.3, 131.3, 131.0, 130.8, 126.0, 124.2, 122.4, 121.7, 120.6, 116.6, 115.8, 115.8, 115.7, 112.0, 111.9, 111.9. MS (MALDI-TOF, 100%): *m/z* calcd (%) for C<sub>22</sub>H<sub>10</sub>Cl<sub>2</sub>F<sub>12</sub>N<sub>2</sub>: 600.0024, found: 600.0613.

## Synthesis of 3a

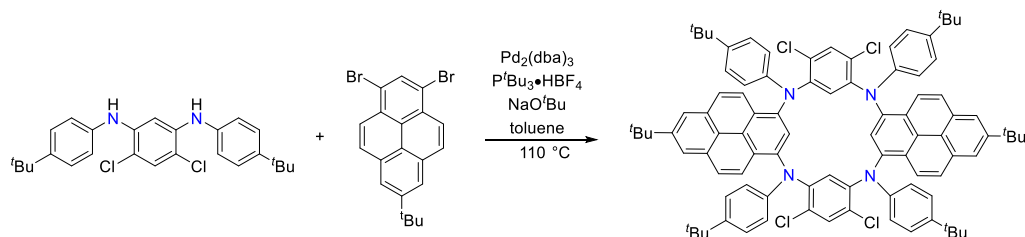

To a mixture of **1a** (218 mg, 0.5 mmol, 1 equiv), 1,3-dibromo-7-(*tert*-butyl)pyrene (208 mg, 0.5 mmol, 1 equiv), Pd<sub>2</sub>(dba)<sub>3</sub> (23 mg, 5 mol %), tri-*tert*-butylphosphonium tetrafluoroborate (Pt-Bu<sub>3</sub>·HBF<sub>4</sub>, 29 mg, 20 mol %) and NaOt-Bu (144 mg, 1.5 mmol, 3 equiv), dry toluene (20 mL) was added under N<sub>2</sub> atmosphere. The mixture was heated at 110 °C for 24 h. Upon completion, the solution was filtrated and the filtrate was evaporated to dryness. The residue was purified by column chromatography on silica gel (petroleum ether/CH<sub>2</sub>Cl<sub>2</sub> 3:1) to afford **3a** (110 mg) as a yellow solid in 16% yield. It was directly utilized in the next step. **3a** shows complicated broad peaks in the <sup>1</sup>H NMR spectrum likely owing to the existence of atropisomers. MS (MALDI-TOF, 100%): *m/z* calcd (%) for C<sub>92</sub>H<sub>88</sub>Cl<sub>4</sub>N<sub>4</sub>: 1390.5755, found: 1390.5889.

## Synthesis of 3b

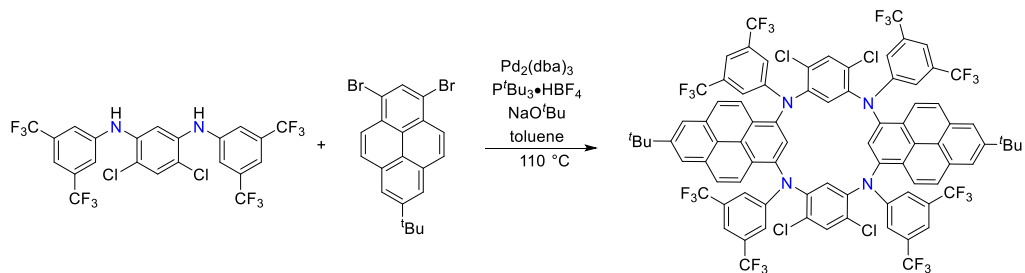

To a mixture of **1b** (120 mg, 0.2 mmol, 1 equiv), 1,3-dibromo-7-(*tert*-butyl)pyrene (84 mg, 0.2 mmol, 1 equiv), Pd<sub>2</sub>(dba)<sub>3</sub> (7 mg, 4 mol %), Pt-Bu<sub>3</sub>·HBF<sub>4</sub> (9 mg, 16 mol %) and NaOt-Bu (58 mg, 0.6 mmol, 3 equiv), dry toluene (20 mL) was added under N<sub>2</sub> atmosphere. The mixture was heated at 110 °C for 24 h. Upon completion, the solution was filtrated and the filtrate was evaporated to dryness. The residue was purified by the column chromatography on silica gel (petroleum ether/CH<sub>2</sub>Cl<sub>2</sub> 3:1) to afford **3a** (34 mg) as a white solid in 10% yield. It was directly utilized in the next step. **3b** shows complicated broad peaks in the <sup>1</sup>H NMR spectrum likely owing to the existence of atropisomers. MS (MALDI-TOF, 100%): *m/z* calcd (%) for C<sub>84</sub>H<sub>48</sub>Cl<sub>4</sub>F<sub>24</sub>N<sub>4</sub>: 1710.2239, found: 1710.2702.

## Synthesis of MC1 and MC2

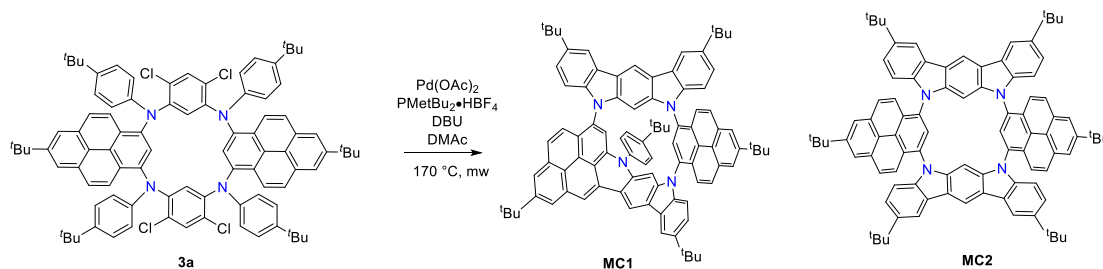

A 30 mL tube was charged with **3a** (50 mg, 0.04 mmol, 1 equiv), Pd(OAc)<sub>2</sub> (27 mg, 3 equiv), di-*tert*-butyl(methyl)phosphonium tetrafluoroborate (PMe(*t*-Bu)<sub>2</sub>·HBF<sub>4</sub>, 92 mg, 9 equiv), 1,8-diazabicyclo[5.4.0]undec-7-ene (DBU, 0.3 mL) and dry dimethylacetamide (5 mL) under argon. The mixture was sealed and heated to 170 °C under microwave conditions for 5 h. The mixture was cooled and poured into water. The precipitate was collected and purified by the column chromatography on silica gel (petroleum ether/CH<sub>2</sub>Cl<sub>2</sub> 3:1) to afford **MC1** (2 mg, 5%) and **MC2** (40 mg, 90%) as yellow solids.

**MC1**: <sup>1</sup>H NMR (600 MHz, CD<sub>2</sub>Cl<sub>2</sub>): δ 8.87 (s, 1H), 8.80 (d, *J*=9.1 Hz, 1H), 8.40 (s, 2H), 8.38 – 8.31 (m, 3H), 8.26 (d, *J*=7.8 Hz, 2H), 8.16 (s, 1H), 8.12 (s, 1H), 8.10 (s, 1H), 8.03 (s, 1H), 7.83 (d, *J*=9.3 Hz, 1H), 7.76 (d, *J*=8.3 Hz, 1H), 7.72 – 7.66 (m, 3H), 7.48 – 7.45 (m, 1H), 7.38 (d, *J*=8.6 Hz, 1H), 7.18 (dd, *J*=8.7, 1.9 Hz, 1H), 7.07 (s, 1H), 7.04 (d, *J*=8.9 Hz, 2H), 6.87 (d, *J*=8.9 Hz, 2H), 6.72 (s, 1H), 6.64 (s, 1H), 6.55 (d, *J*=9.2 Hz, 1H), 6.46 (d, *J*=8.6 Hz, 1H), 1.59 (d, *J*=2.8 Hz, 19H), 1.53 (s, 9H), 1.43 (s, 9H), 1.39 (s, 9H), 0.98 (s, 9H). <sup>13</sup>C NMR (150 MHz, CD<sub>2</sub>Cl<sub>2</sub>): δ 151.1, 151.0, 150.0, 145.9, 145.5, 145.0, 144.4, 144.0, 143.9, 143.9, 143.8, 143.8, 142.4, 140.3, 139.6, 136.9, 134.6, 133.8, 133.6, 132.0, 131.7, 131.7, 131.3, 131.1, 130.6, 130.3, 129.6, 129.4, 127.2, 127.2, 127.2, 127.0, 126.9, 126.8, 126.5, 126.4, 125.7, 124.9, 124.7, 124.4, 124.2, 123.9, 123.8, 123.6, 123.5, 123.3, 122.8, 122.7, 122.7, 122.7, 121.2, 120.9, 120.7, 117.4, 117.2, 116.8, 116.3, 116.1, 112.8, 112.2, 112.1, 111.6, 111.2, 91.3, 35.8, 35.8, 35.4, 35.3, 35.2, 34.3, 32.4, 32.3, 32.2, 32.1, 32.1, 31.5. MS (MALDI-TOF, 100%): *m/z* calcd (%) for C<sub>92</sub>H<sub>84</sub>N<sub>4</sub>: 1245.6723, found: 1245.6885.

**MC2**: <sup>1</sup>H NMR (600 MHz, CD<sub>2</sub>Cl<sub>2</sub>): δ 9.05 (d, *J*=3.5 Hz, 2H), 8.42 (d, *J*=3.5 Hz, 6H), 8.25 (s, 4H), 8.01 (d, *J*=9.4 Hz, 4H), 7.81 (dd, *J*=9.4, 3.0 Hz, 4H), 7.41 (dt, *J*=8.6, 2.3 Hz, 4H), 7.39 – 7.37 (m, 2H), 6.99 (dd, *J*=8.5, 3.2 Hz, 4H), 1.52 (d, *J*=3.1 Hz, 54H). <sup>13</sup>C NMR (150 MHz, CD<sub>2</sub>Cl<sub>2</sub>): δ 150.9, 143.8, 143.6, 141.2, 132.5, 131.4, 129.5, 128.6, 127.6, 126.9, 124.3, 124.2, 123.5, 123.3, 123.1, 119.9, 116.7, 111.8, 110.2, 89.9, 35.7, 35.3, 32.4, 32.0. MS (MALDI-TOF, 100%): *m/z* calcd (%) for C<sub>92</sub>H<sub>84</sub>N<sub>4</sub>: 1245.6723, found: 1245.7137.

## Synthesis of MC3

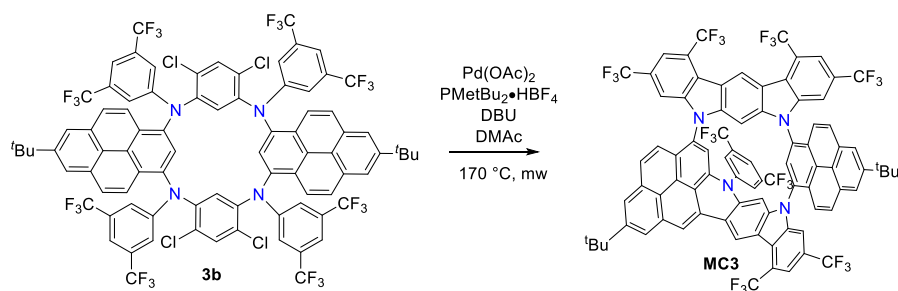

A 30 mL tube was charged with **3a** (40 mg, 0.02 mmol, 1 equiv),  $\text{Pd}(\text{OAc})_2$  (22 mg, 3 equiv),  $\text{PMe}(\text{t-Bu})_2 \cdot \text{HBF}_4$  (74 mg, 9 equiv), 1,8-diazabicyclo[5.4.0]undec-7-ene (DBU, 0.2 mL) and dry dimethylacetamide (5 mL) under argon. The mixture was sealed and heated to  $170^\circ\text{C}$  under microwave conditions for 5 h. The mixture was cooled and poured into water. The precipitate was collected and purified by the column chromatography on silica gel (petroleum ether/ $\text{CH}_2\text{Cl}_2$  3:1) to afford **MC3** (31 mg, 85%) as a yellow solid.  $^1\text{H}$  NMR (500 MHz,  $\text{CD}_2\text{Cl}_2$ ):  $\delta$  9.65 (s, 1H), 8.74 (d,  $J=9.1$  Hz, 1H), 8.64 (s, 1H), 8.56 – 8.49 (m, 3H), 8.47 (s, 1H), 8.41 (s, 1H), 8.38 (s, 1H), 8.35 (s, 1H), 8.23 (d,  $J=1.7$  Hz, 1H), 8.11 (s, 2H), 8.00 – 7.88 (m, 4H), 7.46 (s, 2H), 7.40 (d,  $J=9.3$  Hz, 1H), 7.29 (s, 1H), 7.21 (s, 1H), 7.16 (s, 1H), 6.89 (s, 1H), 6.83 (s, 1H), 6.49 (d,  $J=9.3$  Hz, 1H), 1.61 (s, 9H), 1.59 (s, 9H).  $^{19}\text{F}$  NMR (471 MHz,  $\text{CD}_2\text{Cl}_2$ ):  $\delta$  -61.63, -61.81, -61.82, -62.15, -63.15, -63.17, -63.42.  $^{13}\text{C}$  NMR (125 MHz,  $\text{CD}_2\text{Cl}_2$ ):  $\delta$  152.3, 152.0, 149.4, 149.0, 146.9, 145.8, 145.7, 145.4, 144.5, 142.8, 136.4, 133.5, 133.0, 132.9, 132.7, 132.6, 132.5, 132.1, 131.6, 131.5, 131.4, 131.1, 130.5, 130.4, 130.1, 129.8, 129.7, 129.4, 129.1, 127.9, 127.4, 126.6, 126.3, 126.3, 125.8, 125.6, 125.4, 125.0, 124.9, 123.8, 123.3, 123.0, 122.9, 122.1, 122.1, 121.8, 121.4, 120.7, 118.2, 118.0, 115.8, 114.7, 114.0, 113.8, 113.2, 113.0, 91.0, 36.0, 35.9, 32.1, 32.0. MS (MALDI-TOF):  $[\text{M}]^+$  calcd for  $\text{C}_{84}\text{H}_{44}\text{F}_{24}\text{N}_4$ : 1564.3177, found 1564.3481.

### 3. Chiral HPLC chromatograms

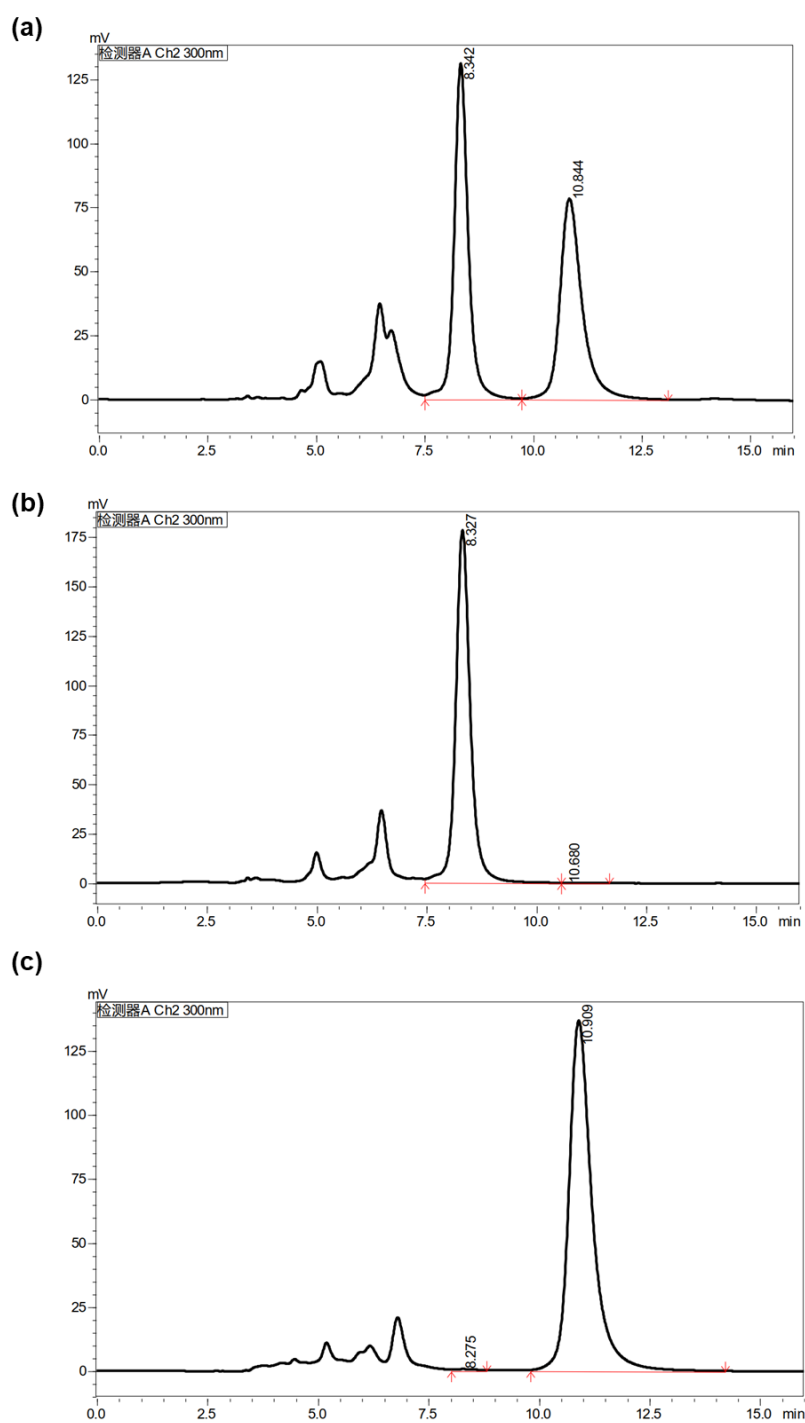

**Figure S1:** Resolution of **MC1** by chiral HPLC monitored at 300 nm was performed with a CHIRALPAK IF (0.46 cm I.D.  $\times$  25 cm L). Injection volume was 100  $\mu$ L, and a mixture of MeOH/DCM 70:30 (V/V) was used as the eluent with a flow rate of 1.0 mL/min at 35  $^{\circ}$ C.



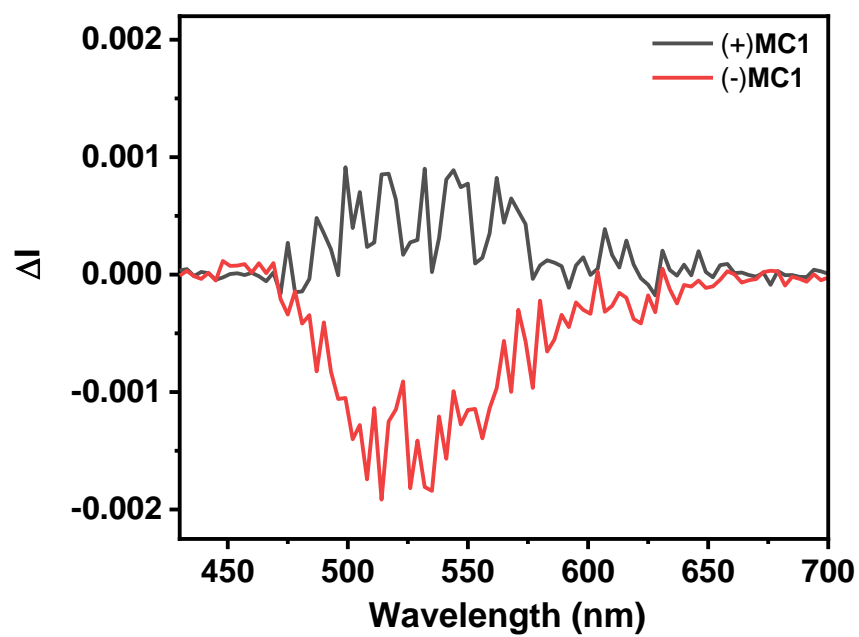

**Figure S2:** CPL emission spectra of enantiomers of **MC1** measured in dichloromethane at room temperature. The concentrations were 10  $\mu\text{M}$

#### 4. X-ray crystal structures

Crystallographic data have been deposited with the Cambridge Crystallographic Data Centre as supplementary publication on No. CCDC 2451256 (**MC3**), 2451257 (**MC2**) and 2451258 (**3a**). These data are provided free of charge by the joint Cambridge Crystallographic Data Centre via <https://www.ccdc.cam.ac.uk/structures/>. The crystallographic data were summarized below.

**Table S1.** Crystal data and structure refinement for **3a**.

|                                  |                                                                |
|----------------------------------|----------------------------------------------------------------|
| Identification code              | 3a                                                             |
| Empirical formula                | C <sub>92</sub> H <sub>88</sub> Cl <sub>4</sub> N <sub>4</sub> |
| Formula weight                   | 1391.46                                                        |
| Temperature/K                    | 223.00                                                         |
| Crystal system                   | triclinic                                                      |
| Space group                      | P-1                                                            |
| a/Å                              | 19.8177(5)                                                     |
| b/Å                              | 20.7758(5)                                                     |
| c/Å                              | 26.2065(6)                                                     |
| $\alpha$ /°                      | 94.329(2)                                                      |
| $\beta$ /°                       | 102.462(2)                                                     |
| $\gamma$ /°                      | 116.5530(10)                                                   |
| Volume/Å <sup>3</sup>            | 9240.0(4)                                                      |
| Z                                | 4                                                              |
| $\rho_{\text{calc}}/\text{cm}^3$ | 1.000                                                          |
| $\mu/\text{mm}^{-1}$             | 1.471                                                          |
| F(000)                           | 2944.0                                                         |
| Crystal size/mm <sup>3</sup>     | 0.13 × 0.12 × 0.11                                             |

|                                                  |                                                                    |
|--------------------------------------------------|--------------------------------------------------------------------|
| Radiation                                        | CuK $\alpha$ ( $\lambda = 1.54178$ )                               |
| 2 $\Theta$ range for data collection/ $^{\circ}$ | 4.85 to 137.12                                                     |
| Index ranges                                     | $-23 \leq h \leq 23$ , $-22 \leq k \leq 25$ , $-31 \leq l \leq 30$ |
| Reflections collected                            | 116982                                                             |
| Independent reflections                          | 33887 [ $R_{\text{int}} = 0.0659$ , $R_{\text{sigma}} = 0.0490$ ]  |
| Data/restraints/parameters                       | 33887/219/1928                                                     |
| Goodness-of-fit on $F^2$                         | 1.026                                                              |
| Final R indexes [ $I \geq 2 \sigma(I)$ ]         | $R_1 = 0.0664$ , $wR_2 = 0.1953$                                   |
| Final R indexes [all data]                       | $R_1 = 0.0948$ , $wR_2 = 0.2174$                                   |
| Largest diff. peak/hole / $e \text{ \AA}^{-3}$   | 0.36/-0.51                                                         |

**Table S2.** Crystal data and structure refinement for **MC2**.

|                                        |                                                |
|----------------------------------------|------------------------------------------------|
| Identification code                    | MC2                                            |
| Empirical formula                      | C <sub>92</sub> H <sub>84</sub> N <sub>4</sub> |
| Formula weight                         | 1245.63                                        |
| Temperature/K                          | 223.00                                         |
| Crystal system                         | triclinic                                      |
| Space group                            | P-1                                            |
| a/Å                                    | 14.6091(3)                                     |
| b/Å                                    | 15.3776(4)                                     |
| c/Å                                    | 22.3624(5)                                     |
| $\alpha$ /°                            | 92.706(2)                                      |
| $\beta$ /°                             | 102.868(2)                                     |
| $\gamma$ /°                            | 107.854(2)                                     |
| Volume/Å <sup>3</sup>                  | 4625.50(19)                                    |
| Z                                      | 2                                              |
| $\rho_{\text{calc}}/\text{cm}^3$       | 0.894                                          |
| $\mu/\text{mm}^{-1}$                   | 0.390                                          |
| F(000)                                 | 1328.0                                         |
| Crystal size/mm <sup>3</sup>           | 0.13 × 0.12 × 0.11                             |
| Radiation                              | CuK $\alpha$ ( $\lambda$ = 1.54178)            |
| 2 $\Theta$ range for data collection/° | 4.084 to 133.186                               |
| Index ranges                           | -13 ≤ h ≤ 17, -18 ≤ k ≤ 18, -26 ≤ l ≤ 26       |

|                                                |                                                                   |
|------------------------------------------------|-------------------------------------------------------------------|
| Reflections collected                          | 58057                                                             |
| Independent reflections                        | 16257 [ $R_{\text{int}} = 0.0761$ , $R_{\text{sigma}} = 0.0742$ ] |
| Data/restraints/parameters                     | 16257/72/914                                                      |
| Goodness-of-fit on $F^2$                       | 1.001                                                             |
| Final R indexes [ $I \geq 2 \sigma(I)$ ]       | $R_1 = 0.1085$ , $wR_2 = 0.2607$                                  |
| Final R indexes [all data]                     | $R_1 = 0.1366$ , $wR_2 = 0.2761$                                  |
| Largest diff. peak/hole / $e \text{ \AA}^{-3}$ | 0.70/-0.39                                                        |

**Table S3.** Crystal data and structure refinement for **MC3**.

|                                        |                                                                |
|----------------------------------------|----------------------------------------------------------------|
| Identification code                    | MC3                                                            |
| Empirical formula                      | C <sub>84</sub> H <sub>44</sub> F <sub>24</sub> N <sub>4</sub> |
| Formula weight                         | 1565.23                                                        |
| Temperature/K                          | 223.00                                                         |
| Crystal system                         | triclinic                                                      |
| Space group                            | P-1                                                            |
| a/Å                                    | 14.7541(12)                                                    |
| b/Å                                    | 16.6391(12)                                                    |
| c/Å                                    | 17.6524(14)                                                    |
| $\alpha$ /°                            | 66.335(5)                                                      |
| $\beta$ /°                             | 80.415(5)                                                      |
| $\gamma$ /°                            | 73.726(5)                                                      |
| Volume/Å <sup>3</sup>                  | 3802.9(5)                                                      |
| Z                                      | 2                                                              |
| $\rho_{\text{calc}}/\text{cm}^3$       | 1.367                                                          |
| $\mu/\text{mm}^{-1}$                   | 1.064                                                          |
| F(000)                                 | 1584.0                                                         |
| Crystal size/mm <sup>3</sup>           | 0.13 × 0.12 × 0.11                                             |
| Radiation                              | CuK $\alpha$ ( $\lambda$ = 1.54178)                            |
| 2 $\Theta$ range for data collection/° | 5.476 to 137.284                                               |
| Index ranges                           | -17 ≤ h ≤ 14, -20 ≤ k ≤ 20, -21 ≤ l ≤ 21                       |

|                                                |                                                                   |
|------------------------------------------------|-------------------------------------------------------------------|
| Reflections collected                          | 37149                                                             |
| Independent reflections                        | 13633 [ $R_{\text{int}} = 0.0629$ , $R_{\text{sigma}} = 0.0569$ ] |
| Data/restraints/parameters                     | 13633/914/1199                                                    |
| Goodness-of-fit on $F^2$                       | 1.037                                                             |
| Final R indexes [ $I \geq 2 \sigma(I)$ ]       | $R_1 = 0.0748$ , $wR_2 = 0.1716$                                  |
| Final R indexes [all data]                     | $R_1 = 0.1092$ , $wR_2 = 0.1910$                                  |
| Largest diff. peak/hole / $e \text{ \AA}^{-3}$ | 0.48/-0.38                                                        |

## 5. Theoretical calculations

For all titled molecules, DFT and time-dependent DFT calculations were performed using the Gaussian 16 software package.<sup>S1</sup> The geometries were optimized with the B3LYP functional and 6-31G(d) basis set. Frontier molecular orbitals were analyzed with Multiwfn 3.8,<sup>S2</sup> and rendered with VMD 1.9.3.<sup>S3</sup>

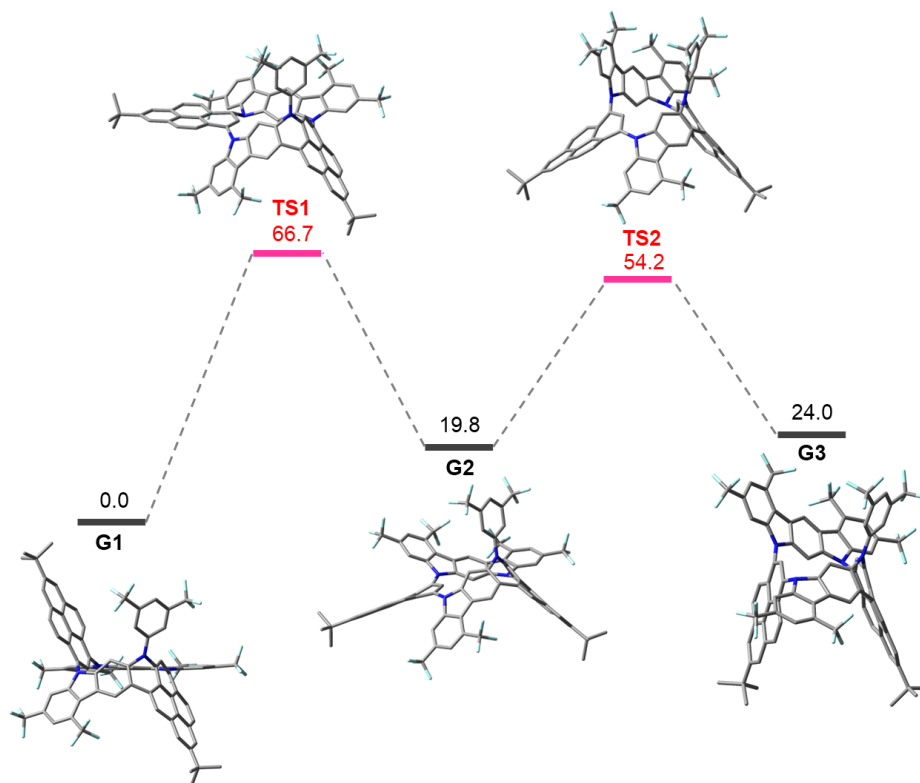

**Figure S3.** Calculated isomerization pathway for **MC3** with relative Gibbs free energy ( $\text{kcal mol}^{-1}$ ) calculated at the B3LYP/6-31G(d) level.

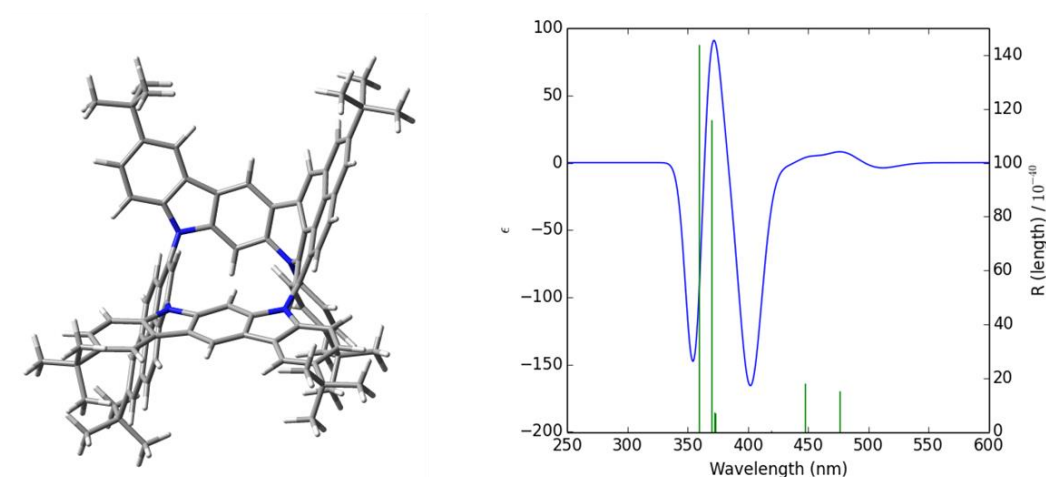

**Figure S4.** Optimized structure of **(+)MC1** (left) and its corresponding CD spectrum (right) calculated at the B3LYP/6-31G(d) level.



## 6. $^1\text{H}$ and $^{13}\text{C}$ NMR spectra

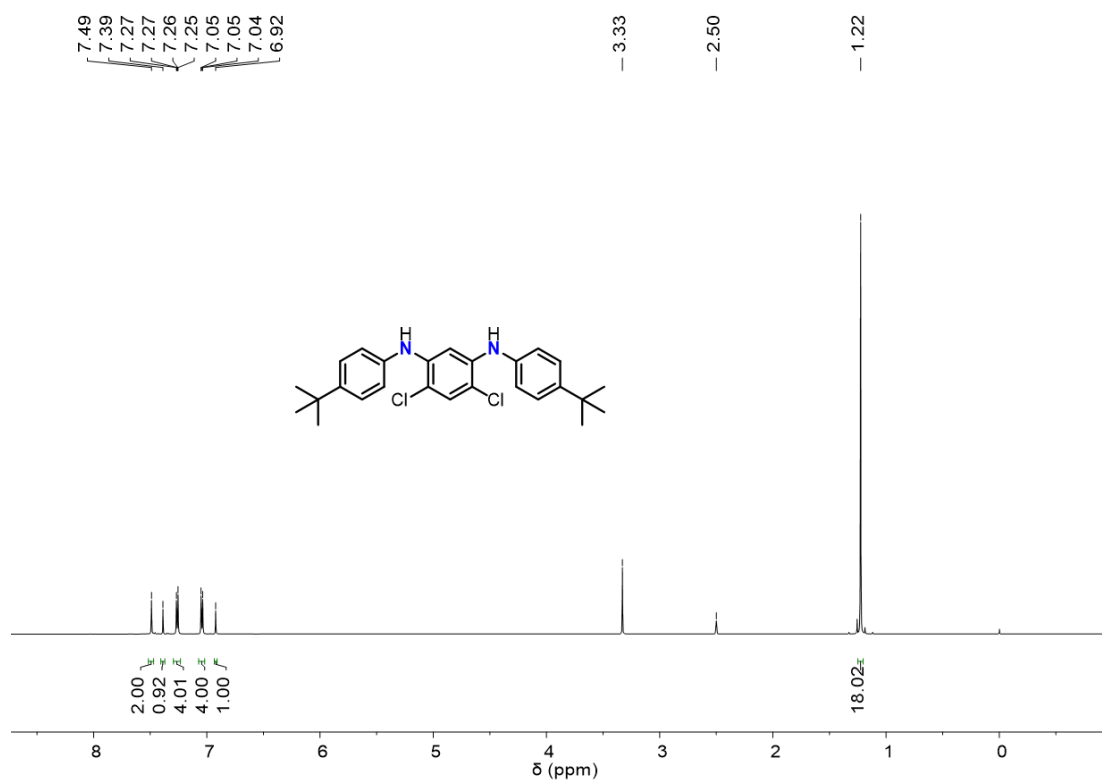

**Figure S5.**  $^1\text{H}$  NMR spectrum (600 MHz) of compound **1a** in  $\text{DMSO}-d_6$  at 298 K.

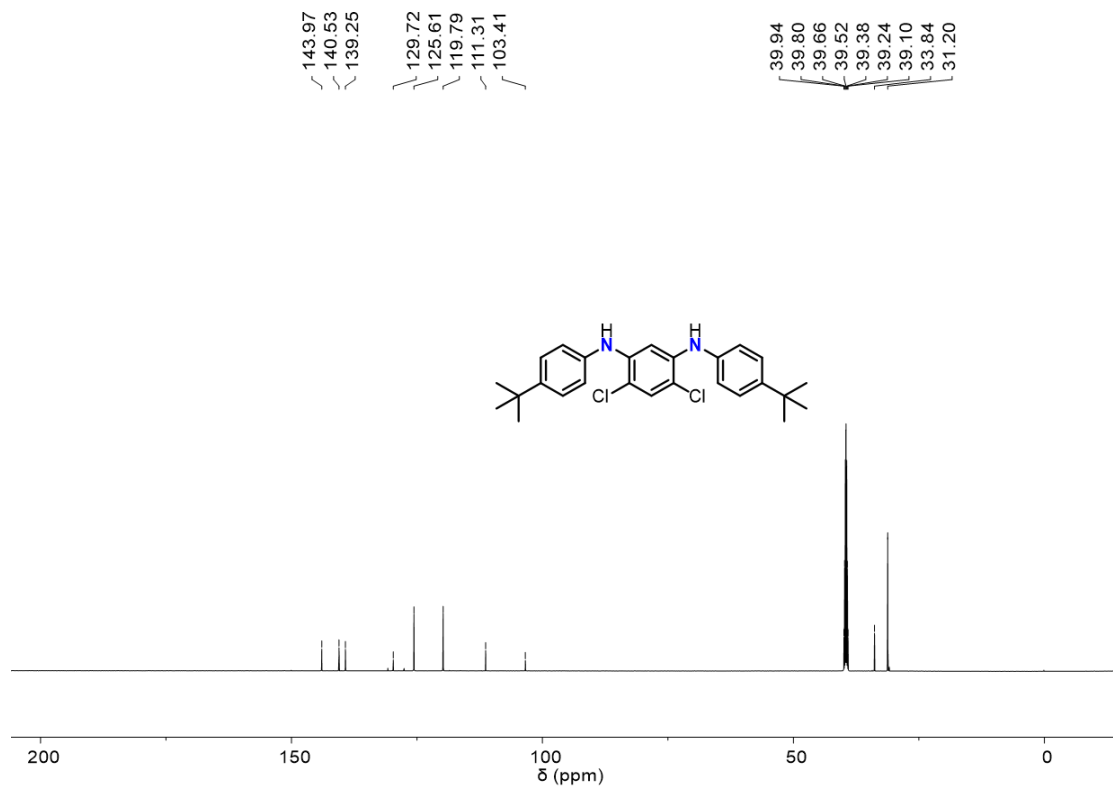

**Figure S6.**  $^{13}\text{C}$  NMR spectrum (150 MHz) of compound **1a** in  $\text{DMSO}-d_6$  at 298 K.

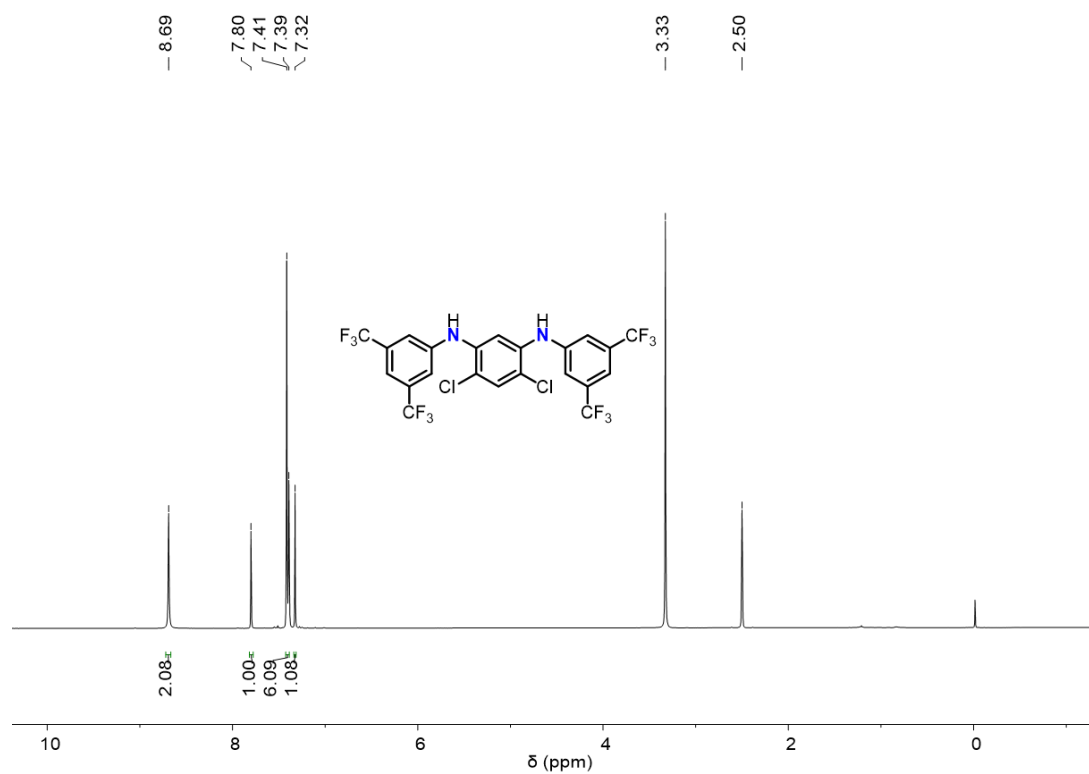

**Figure S7.** <sup>1</sup>H NMR spectrum (600 MHz) of **1b** in DMSO-*d*<sub>6</sub> at 298 K.

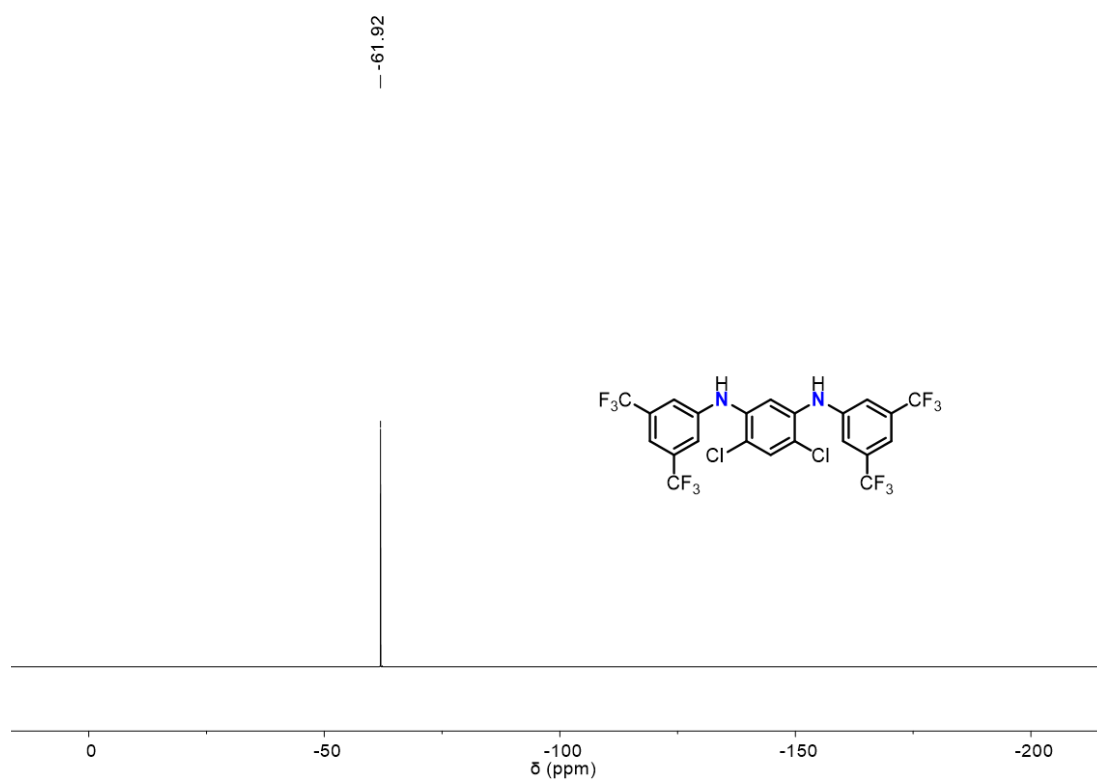

**Figure S8.** <sup>19</sup>F NMR spectrum (565 MHz) of compound **1b** in DMSO-*d*<sub>6</sub> at 298 K.

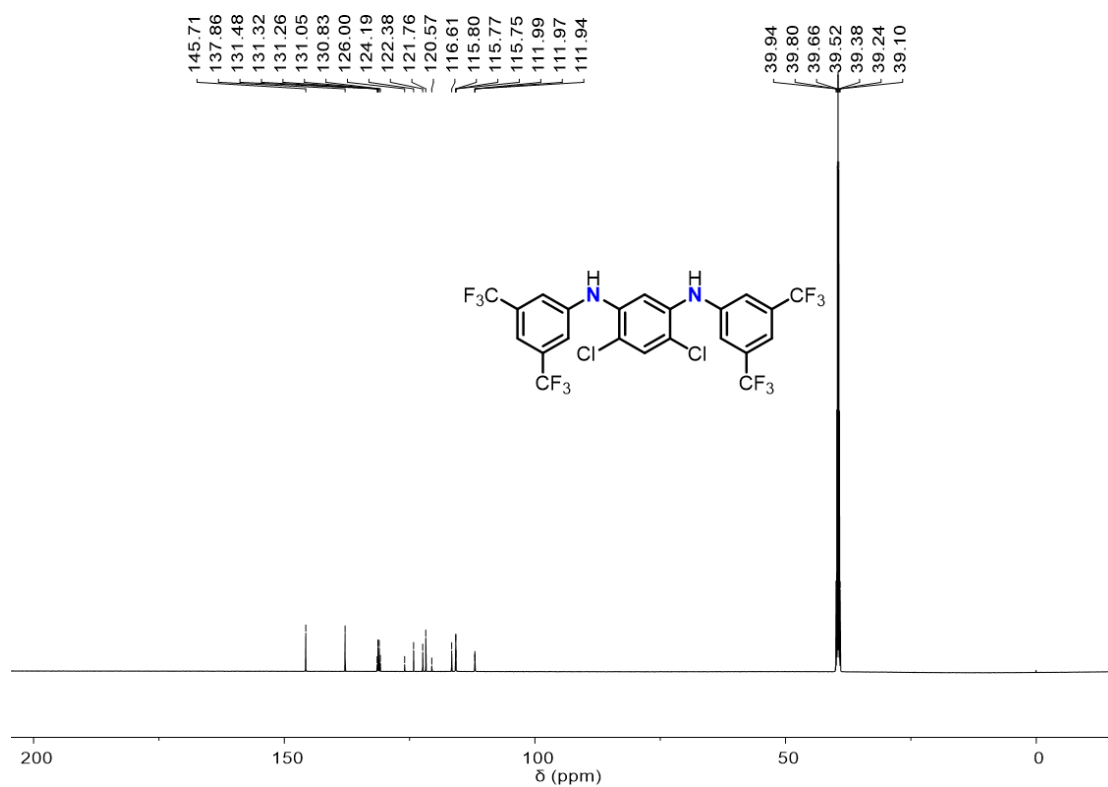

**Figure S9.** <sup>13</sup>C NMR spectrum (150 MHz) of **1b** in DMSO-*d*<sub>6</sub> at 298 K.

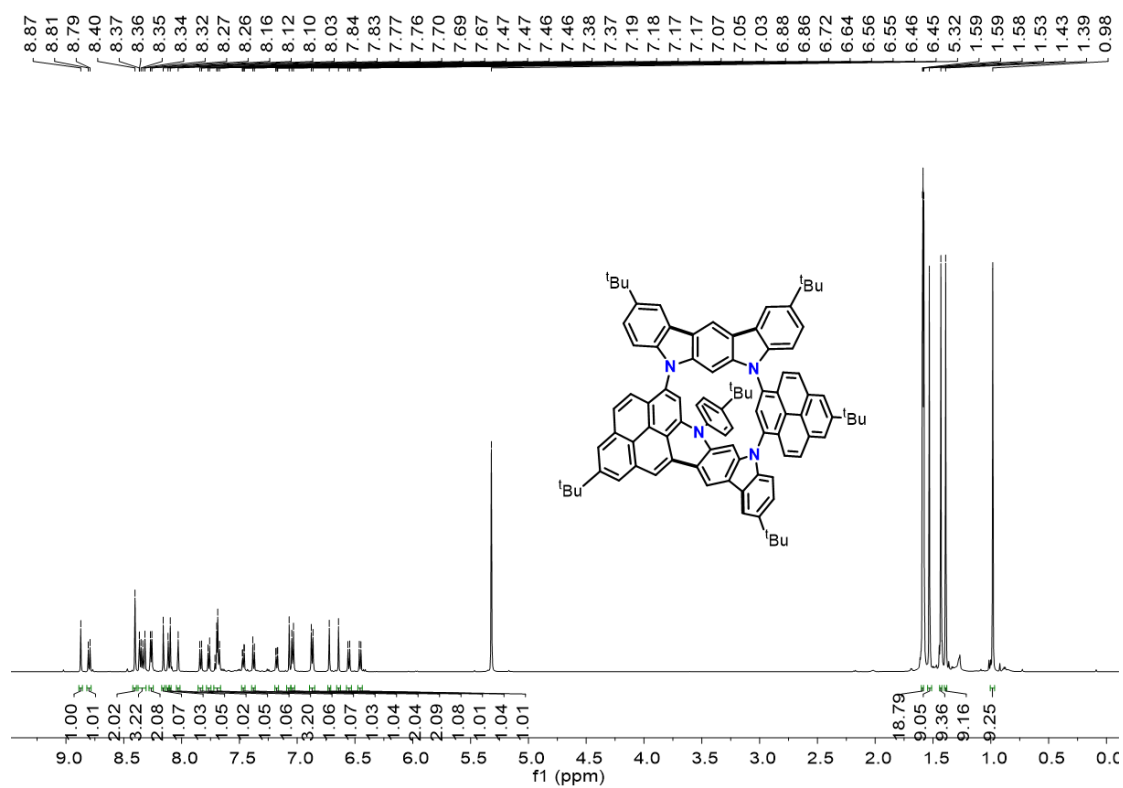

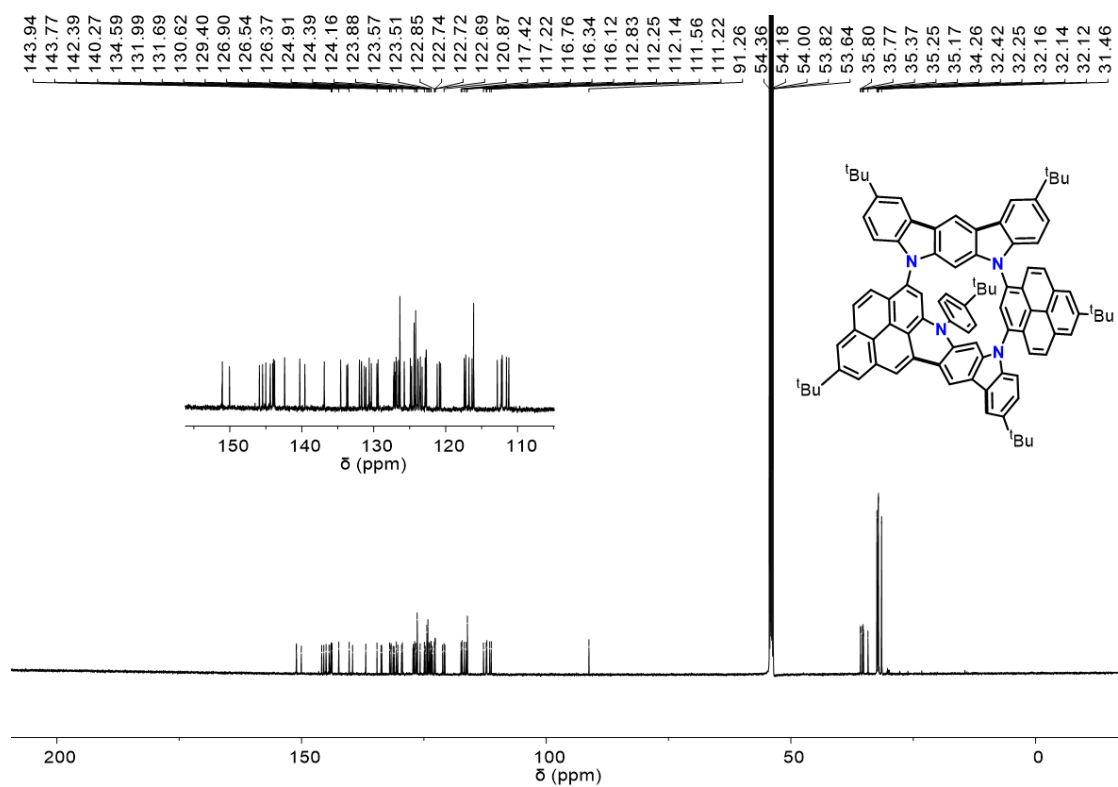

**Figure S11.** <sup>13</sup>C NMR spectrum (150 MHz) of compound **MC1** in CD<sub>2</sub>Cl<sub>2</sub> at 298 K.

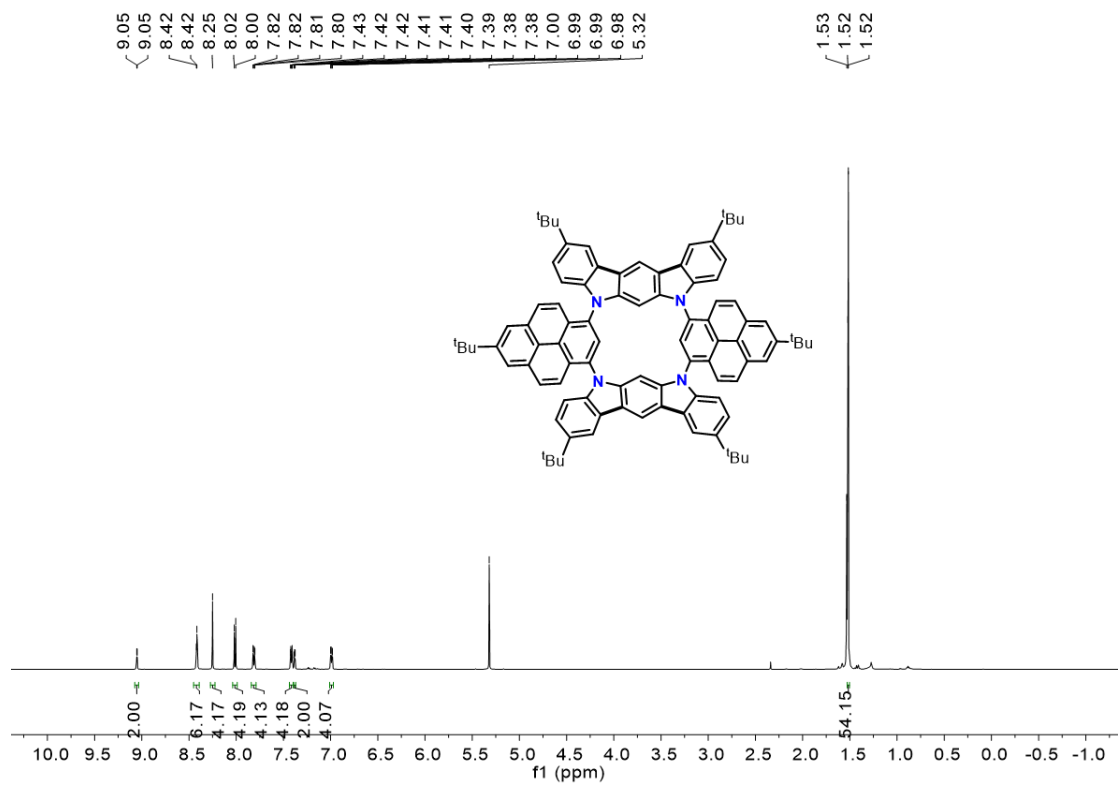

**Figure S12.** <sup>1</sup>H NMR spectrum (600 MHz) of compound **MC2** in CD<sub>2</sub>Cl<sub>2</sub> at 298 K.

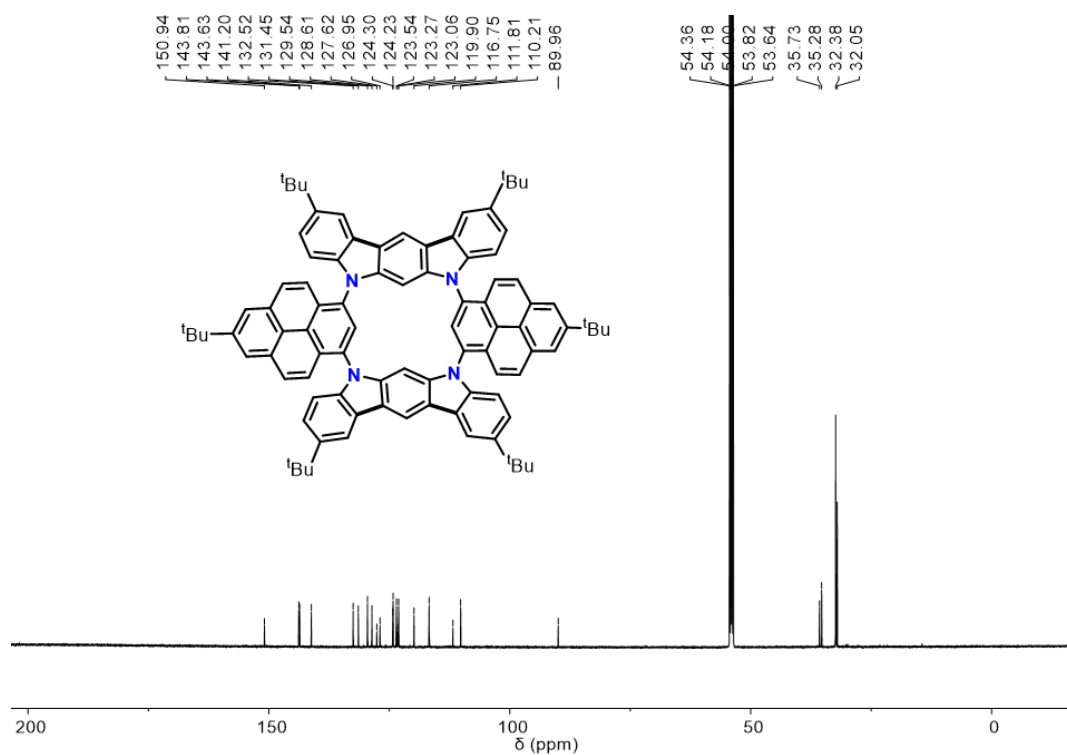

**Figure S13.** <sup>13</sup>C NMR spectrum (150 MHz) of compound **MC2** in CD<sub>2</sub>Cl<sub>2</sub> at 298 K.

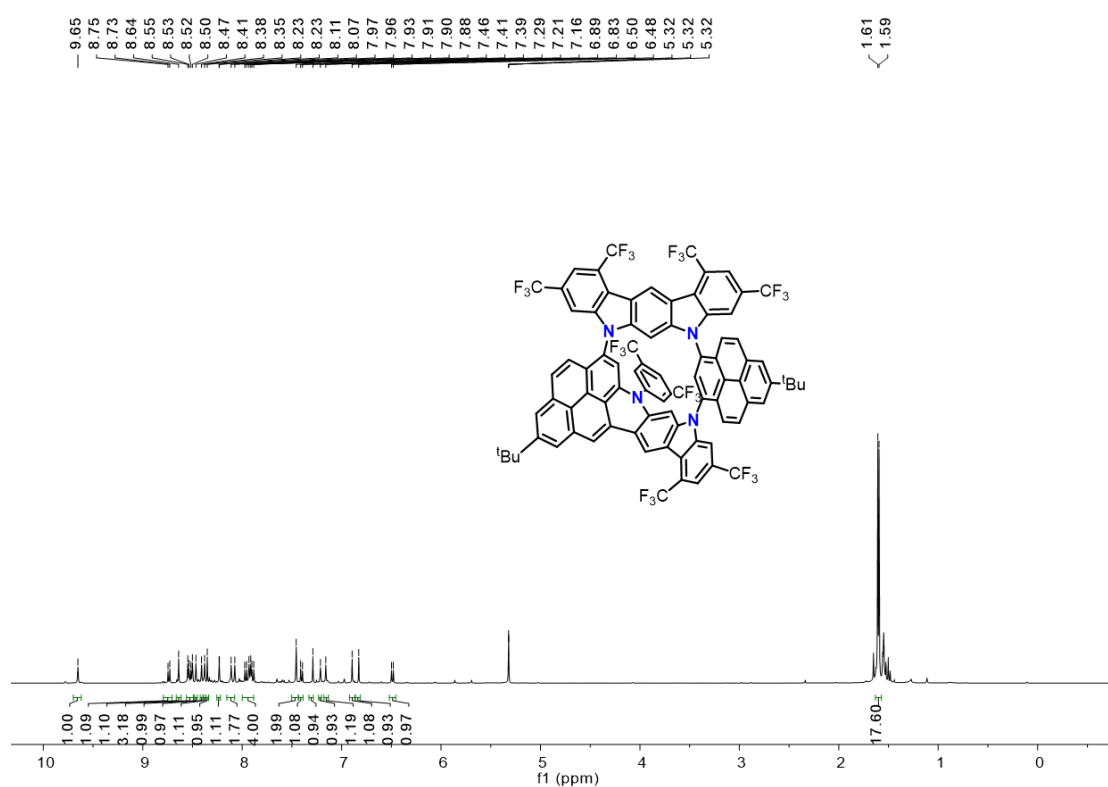

**Figure S14.** <sup>1</sup>H NMR spectrum (500 MHz) of **MC3** measured in CD<sub>2</sub>Cl<sub>2</sub> at 298 K.

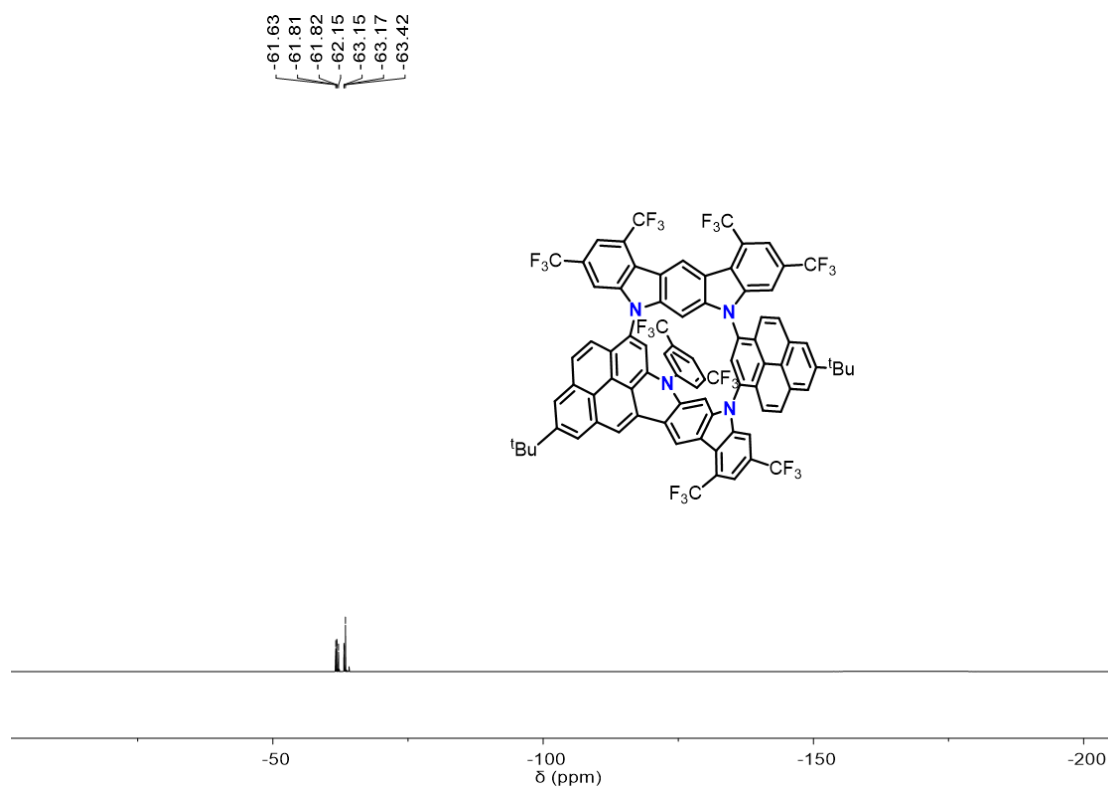

**Figure S15.**  $^{19}\text{F}$  NMR spectrum (471 MHz) of MC3 in  $\text{CD}_2\text{Cl}_2$  at 298 K.

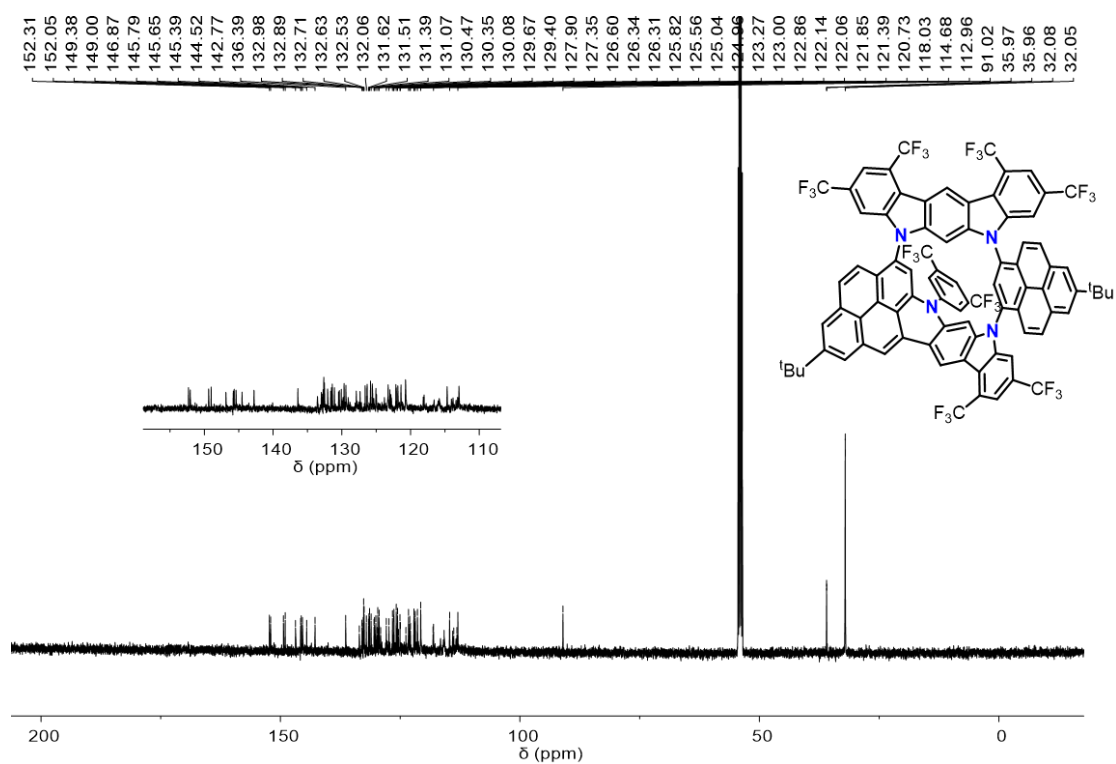

**Figure S16.**  $^{13}\text{C}$  NMR spectrum (125 MHz) of MC3 in  $\text{CD}_2\text{Cl}_2$  at 298 K.

## 7. Mass spectra

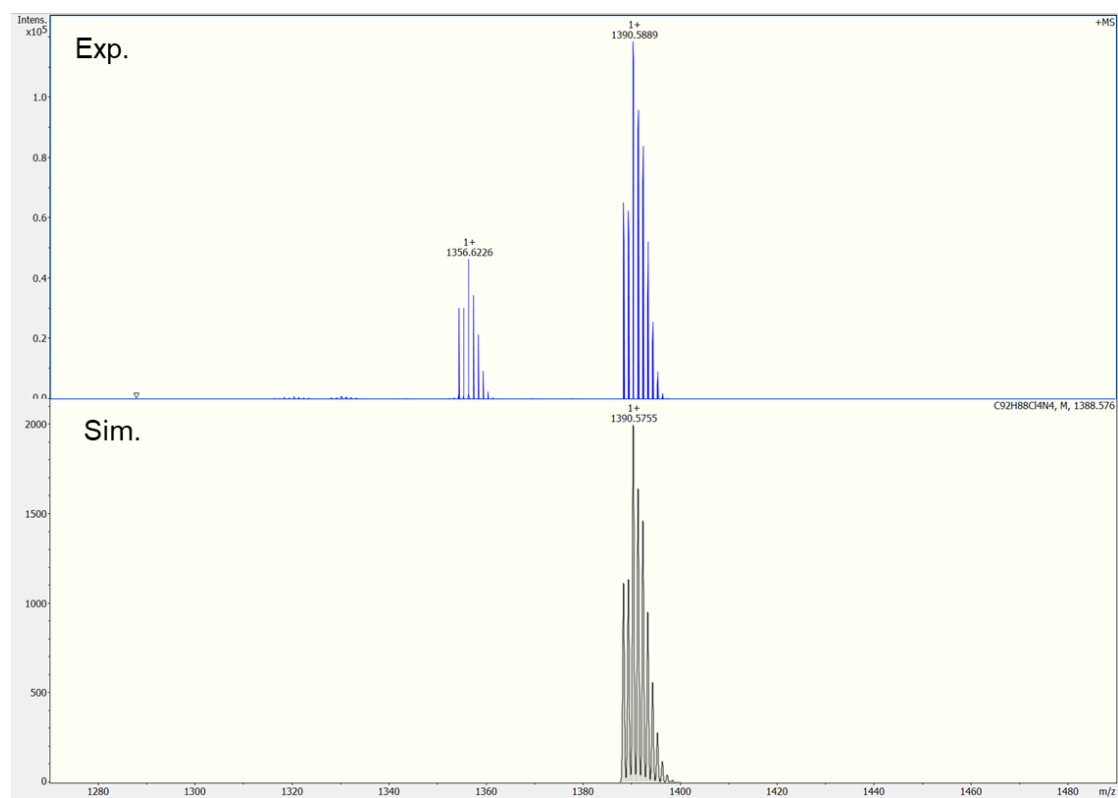

**Figure S17.** Mass spectrum (MALDI-TOF) of **3a**.

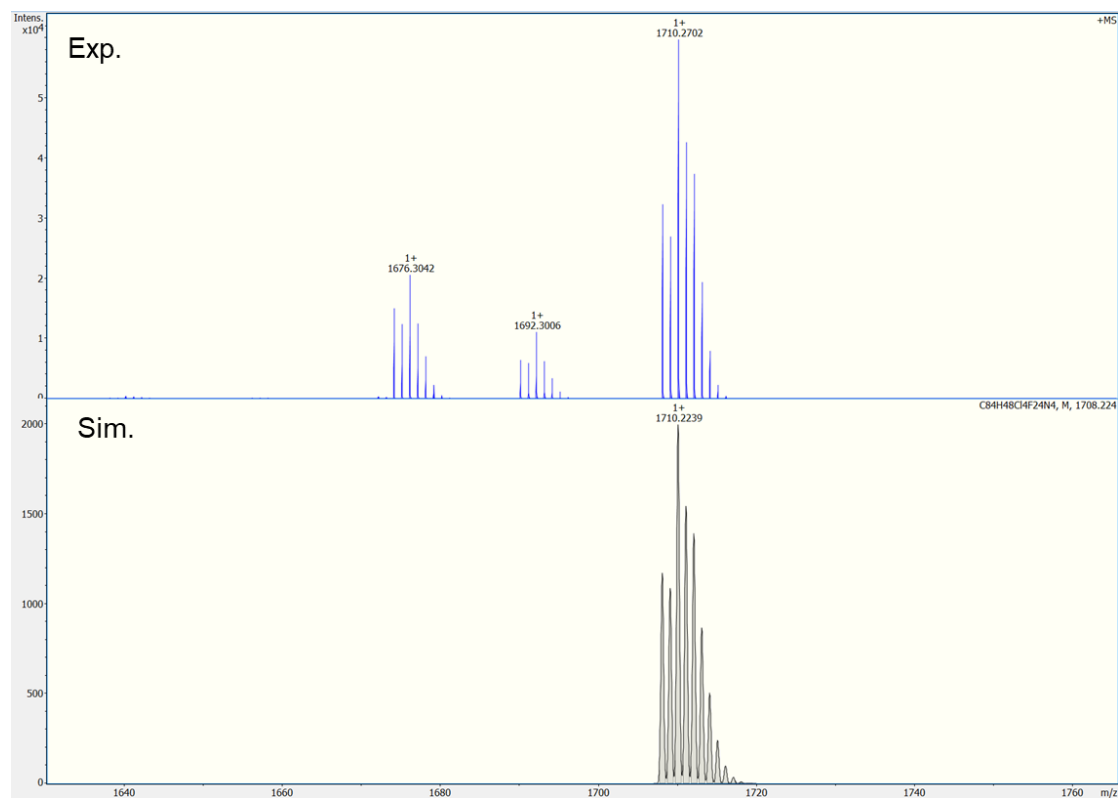

**Figure S18.** Mass spectrum (MALDI-TOF) of **3b**.

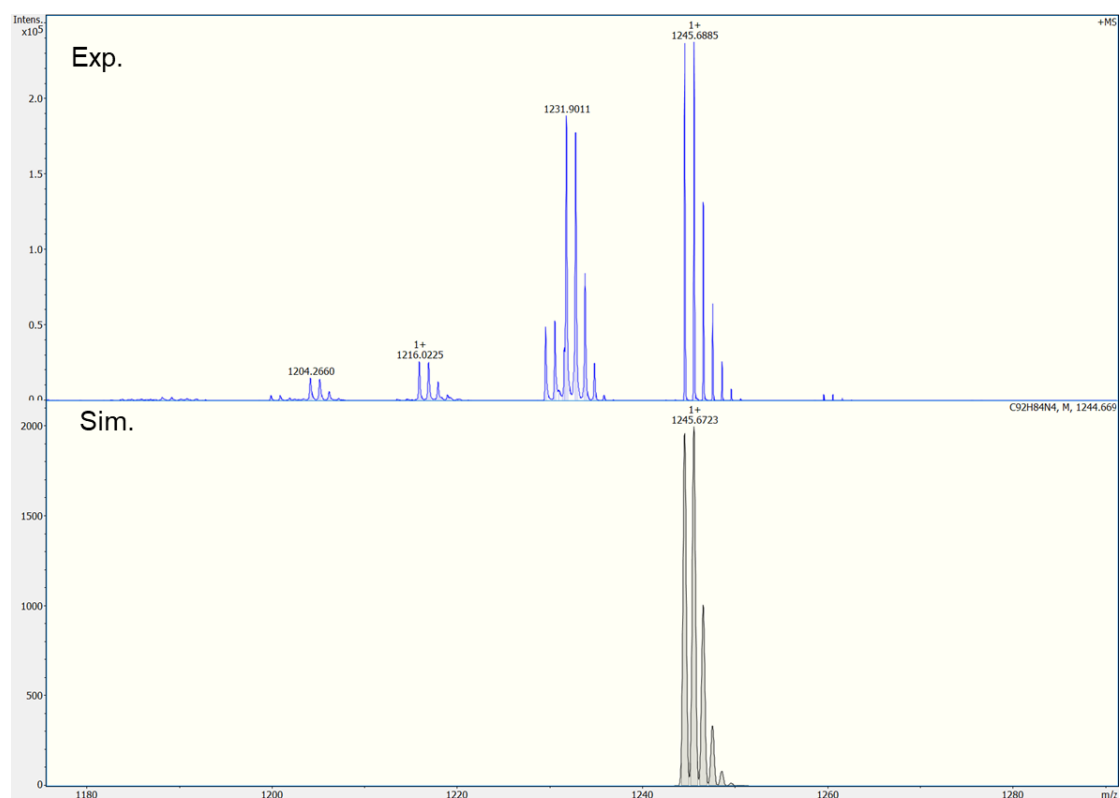

**Figure S19.** Mass spectrum (MALDI-TOF) of **MC1**.

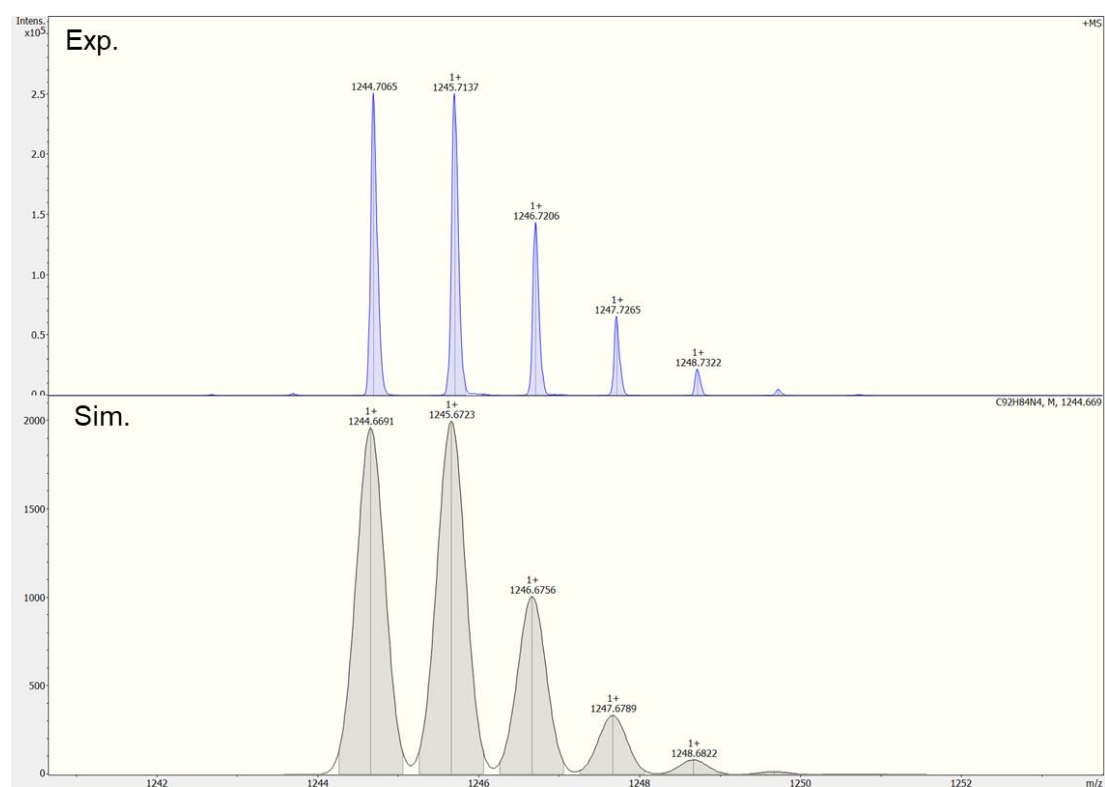

**Figure S20.** Mass spectrum (MALDI-TOF) of **MC2**.



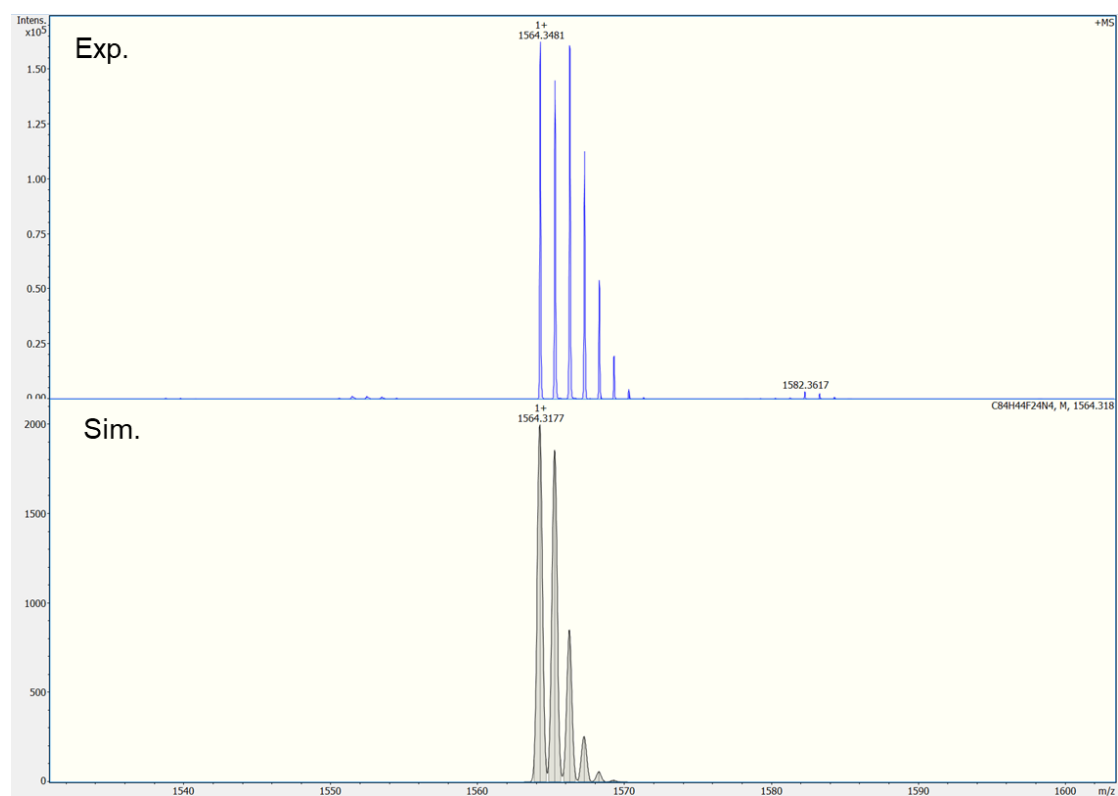

**Figure S21.** Mass spectrum (MALDI-TOF) of **MC3**.

## 8. References

- [S1] Gaussian 16, Revision C.01, M. J. Frisch, G. W. Trucks, H. B. Schlegel, G. E. Scuseria, M. A. Robb, J. R. Cheeseman, G. Scalmani, V. Barone, G. A. Petersson, H. Nakatsuji, X. Li, M. Caricato, A. V. Marenich, J. Bloino, B. G. Janesko, R. Gomperts, B. Mennucci, H. P. Hratchian, J. V. Ortiz, A. F. Izmaylov, J. L. Sonnenberg, D. Williams-Young, F. Ding, F. Lipparini, F. Egidi, J. Goings, B. Peng, A. Petrone, T. Henderson, D. Ranasinghe, V. G. Zakrzewski, J. Gao, N. Rega, G. Zheng, W. Liang, M. Hada, M. Ehara, K. Toyota, R. Fukuda, J. Hasegawa, M. Ishida, T. Nakajima, Y. Honda, O. Kitao, H. Nakai, T. Vreven, K. Throssell, J. A. Montgomery, Jr., J. E. Peralta, F. Ogliaro, M. J. Bearpark, J. J. Heyd, E. N. Brothers, K. N. Kudin, V. N. Staroverov, T. A. Keith, R. Kobayashi, J. Normand, K. Raghavachari, A. P. Rendell, J. C. Burant, S. S. Iyengar, J. Tomasi, M. Cossi, J. M. Millam, M. Klene, C. Adamo, R. Cammi, J. W. Ochterski, R. L. Martin, K. Morokuma, O. Farkas, J. B. Foresman, and D. J. Fox, Gaussian, Inc., Wallingford CT, 2016.
- [S2] Lu, T.; Chen, F. Multiwfn: A multifunctional wavefunction analyzer, *J. Comput. Chem.* **2012**, *33*, 580-592.
- [S3] Humphrey, W.; Dalke, A.; Schulten, K., VMD - Visual Molecular Dynamics, *J. Molec. Graphics*, **1996**, *14*, 33-38
